# Supplementary material
Source: MDPI journal article supplement (https://www.mdpi.com/2073-4352/13/6/977)
Supplement: s1 [file s1]

**Table S1. Appearance characteristics of experimental agate samples.**

| Description of Appearance and Morphology of Moqi Agate Raw Stone |            |                  |                                     |
|------------------------------------------------------------------|------------|------------------|-------------------------------------|
| Sample No.                                                       | Color      | Transparency     | Structure                           |
| AG-1                                                             | green      | opaque           | massive structure, coarse particles |
| AG-2                                                             | green      | opaque           | massive structure, coarse particles |
| AR-1                                                             | Brown and  | Microtransparent | Dense block with obvious stripes    |
|                                                                  | red        |                  |                                     |
| AR-2                                                             | interwoven | opaque           | Dense block with obvious stripes    |
|                                                                  | Yellow and |                  |                                     |
| AR-3                                                             | red        | opaque           | Dense block with obvious stripes    |
|                                                                  | interweave |                  |                                     |
| AY-1                                                             | Red brown  | opaque           | Dense block with obvious stripes    |
|                                                                  | pink       |                  |                                     |
| AY-2                                                             | interwoven | opaque           | Massive structure, fine particles   |
| AY-3                                                             | yellow     | opaque           | Massive structure, fine particles   |
|                                                                  | yellow     | opaque           | Massive structure, fine particles   |
|                                                                  | Reddish    | Microtransparent | Blocky structure                    |
|                                                                  | brown      |                  |                                     |

**Table S2. Attribution of characteristic peaks of agate infrared spectrum**

| No. / quartz     | Si-O asymmetric stretching vibration |      | Si-O-Si symmetric stretching vibration |     |     | Si-O bending vibration |     | Si-O-Si flexural vibration |
|------------------|--------------------------------------|------|----------------------------------------|-----|-----|------------------------|-----|----------------------------|
| $\alpha$ -quartz | 1170                                 | 1080 | 800                                    | 782 | 698 | 513                    | 462 | 532                        |
| Sample           | 1186                                 | 1086 | 789                                    | 773 | 685 | —                      | 466 | 532                        |

**Table S3. Calculation Data for  $I_{(502)}/I_{(464)}$  [%] of Moqi agate and estimated content of plagioclase wt%**

| Sample No | Characteristic peak | y      | y0     | xc     | FWH M   | A         | I (503) /I (465) % | Wt % |           |
|-----------|---------------------|--------|--------|--------|---------|-----------|--------------------|------|-----------|
| AG-1      | 464                 | 975.28 | 3.8997 | 465.45 | 11.3142 | 18820.382 | 6.9                | 21   |           |
|           |                     |        | 1      | 3      |         | 05        |                    |      |           |
|           |                     |        | 503    | 143.36 | 3.8997  | 503.97    |                    |      | 5.31391   |
| AG-2      | 463                 | 998.5  | 1      | 8      |         | 7         | 8.71               | 30   |           |
|           |                     |        | 3.2986 | 465.42 | 12.8173 | 20738.611 |                    |      |           |
|           |                     |        | 1      | 6      | 7       | 44        |                    |      |           |
| AR-1      | 464                 | 758.32 | 163.66 | 3.2986 | 503.76  | 6.81577   | 1690.5827          | 8.78 | 31        |
|           |                     |        | 1      | 2      |         | 8         |                    |      |           |
|           |                     |        | 503    | 128.44 | 3.8883  | 502.70    | 6.81577            |      |           |
| AR-2      | 464                 | 4432   | 1      | 4      |         | 9         | 7.89               | 29   |           |
|           |                     |        | 2.7237 | 463.84 | 11.3126 | 1086.8087 |                    |      |           |
|           |                     |        | 3      | 6      | 8       | 4         |                    |      |           |
| AR-3      | 502                 | 3757   | 2.7237 | 503.44 | 6.31647 | 13402.438 | 7.89               | 29   |           |
|           |                     |        | 3      | 6      |         | 61        |                    |      |           |
|           |                     |        | —      | —      | —       | —         |                    |      | —         |
| AY-1      | 464                 | 514.78 | —      | —      | —       | —         | 9.05               | 32   |           |
|           |                     |        | —      | —      | —       | —         |                    |      |           |
|           |                     |        | 4.5484 | 5      | 9       | 45        |                    |      |           |
| AY-2      | 464                 | 1216.5 | 1      |        |         |           | 5.19               | 20   |           |
|           |                     |        | 3061.9 | -      | 500.27  | 8.29115   |                    |      | 6745.9141 |
|           |                     |        | 6      | 4.5484 | 1       |           |                    |      | 2         |
| AY-3      | 464                 | 4776   | 1      |        |         |           | 11.33              | 35   |           |
|           |                     |        | 2.1133 | 465.87 | 11.7298 | 13402.438 |                    |      |           |
|           |                     |        | 9      | 9      | 2       | 8         |                    |      | 61        |
| AY-4      | 503                 | 1271.4 | 2.1133 | 503.74 | 10.1949 | 1086.8087 | 5.19               | 20   |           |
|           |                     |        | 4      | 9      | 1       | 6         |                    |      | 4         |
|           |                     |        | 9      | 1      | 8       | 8         |                    |      |           |
| AY-5      | 464                 | 4776   | 0.9702 | 464.61 | 13.7483 | 8124.0192 | 11.33              | 35   |           |
|           |                     |        | 9      | 1      | 8       | 8         |                    |      |           |
|           |                     |        | 503    | 4001   | 0.9702  | 503.07    |                    |      | 9.74816   |
| AY-6      | 464                 | 4776   | 9      | 1      |         |           | 11.33              | 35   |           |
|           |                     |        | 9      | 1      |         |           |                    |      |           |
|           |                     |        | 503    | 4001   | 0.9702  | 503.07    |                    |      | 9.74816   |
| AY-7      | 464                 | 4776   | 9      | 1      |         |           | 11.33              | 35   |           |
|           |                     |        | 9      | 1      |         |           |                    |      |           |
|           |                     |        | 503    | 4001   | 0.9702  | 503.07    |                    |      | 9.74816   |
| AY-8      | 464                 | 4776   | 9      | 1      |         |           | 11.33              | 35   |           |
|           |                     |        | 9      | 1      |         |           |                    |      |           |
|           |                     |        | 503    | 4001   | 0.9702  | 503.07    |                    |      | 9.74816   |
| AY-9      | 464                 | 4776   | 9      | 1      |         |           | 11.33              | 35   |           |
|           |                     |        | 9      | 1      |         |           |                    |      |           |
|           |                     |        | 503    | 4001   | 0.9702  | 503.07    |                    |      | 9.74816   |
| AY-10     | 464                 | 4776   | 9      | 1      |         |           | 11.33              | 35   |           |
|           |                     |        | 9      | 1      |         |           |                    |      |           |
|           |                     |        | 503    | 4001   | 0.9702  | 503.07    |                    |      | 9.74816   |
| AY-11     | 464                 | 4776   | 9      | 1      |         |           | 11.33              | 35   |           |
|           |                     |        | 9      | 1      |         |           |                    |      |           |
|           |                     |        | 503    | 4001   | 0.9702  | 503.07    |                    |      | 9.74816   |
| AY-12     | 464                 | 4776   | 9      | 1      |         |           | 11.33              | 35   |           |
|           |                     |        | 9      | 1      |         |           |                    |      |           |
|           |                     |        | 503    | 4001   | 0.9702  | 503.07    |                    |      | 9.74816   |
| AY-13     | 464                 | 4776   | 9      | 1      |         |           | 11.33              | 35   |           |
|           |                     |        | 9      | 1      |         |           |                    |      |           |
|           |                     |        | 503    | 4001   | 0.9702  | 503.07    |                    |      | 9.74816   |
| AY-14     | 464                 | 4776   | 9      | 1      |         |           | 11.33              | 35   |           |
|           |                     |        | 9      | 1      |         |           |                    |      |           |
|           |                     |        | 503    | 4001   | 0.9702  | 503.07    |                    |      | 9.74816   |
| AY-15     | 464                 | 4776   | 9      | 1      |         |           | 11.33              | 35   |           |
|           |                     |        | 9      | 1      |         |           |                    |      |           |
|           |                     |        | 503    | 4001   | 0.9702  | 503.07    |                    |      | 9.74816   |
| AY-16     | 464                 | 4776   | 9      | 1      |         |           | 11.33              | 35   |           |
|           |                     |        | 9      | 1      |         |           |                    |      |           |
|           |                     |        | 503    | 4001   | 0.9702  | 503.07    |                    |      | 9.74816   |
| AY-17     | 464                 | 4776   | 9      | 1      |         |           | 11.33              | 35   |           |
|           |                     |        | 9      | 1      |         |           |                    |      |           |
|           |                     |        | 503    | 4001   | 0.9702  | 503.07    |                    |      | 9.74816   |
| AY-18     | 464                 | 4776   | 9      | 1      |         |           | 11.33              | 35   |           |
|           |                     |        | 9      | 1      |         |           |                    |      |           |
|           |                     |        | 503    | 4001   | 0.9702  | 503.07    |                    |      | 9.74816   |
| AY-19     | 464                 | 4776   | 9      | 1      |         |           | 11.33              | 35   |           |
|           |                     |        | 9      | 1      |         |           |                    |      |           |
|           |                     |        | 503    | 4001   | 0.9702  | 503.07    |                    |      | 9.74816   |
| AY-20     | 464                 | 4776   | 9      | 1      |         |           | 11.33              | 35   |           |
|           |                     |        | 9      | 1      |         |           |                    |      |           |
|           |                     |        | 503    | 4001   | 0.9702  | 503.07    |                    |      | 9.74816   |
| AY-21     | 464                 | 4776   | 9      | 1      |         |           | 11.33              | 35   |           |
|           |                     |        | 9      | 1      |         |           |                    |      |           |
|           |                     |        | 503    | 4001   | 0.9702  | 503.07    |                    |      | 9.74816   |
| AY-22     | 464                 | 4776   | 9      | 1      |         |           | 11.33              | 35   |           |
|           |                     |        | 9      | 1      |         |           |                    |      |           |
|           |                     |        | 503    | 4001   | 0.9702  | 503.07    |                    |      | 9.74816   |
| AY-23     | 464                 | 4776   | 9      | 1      |         |           | 11.33              | 35   |           |
|           |                     |        | 9      | 1      |         |           |                    |      |           |
|           |                     |        | 503    | 4001   | 0.9702  | 503.07    |                    |      | 9.74816   |
| AY-24     | 464                 | 4776   | 9      | 1      |         |           | 11.33              | 35   |           |
|           |                     |        | 9      | 1      |         |           |                    |      |           |
|           |                     |        | 503    | 4001   | 0.9702  | 503.07    |                    |      | 9.74816   |
| AY-25     | 464                 | 4776   | 9      | 1      |         |           | 11.33              | 35   |           |
|           |                     |        | 9      | 1      |         |           |                    |      |           |
|           |                     |        | 503    | 4001   | 0.9702  | 503.07    |                    |      | 9.74816   |
| AY-26     | 464                 | 4776   | 9      | 1      |         |           | 11.33              | 35   |           |
|           |                     |        | 9      | 1      |         |           |                    |      |           |
|           |                     |        | 503    | 4001   | 0.9702  | 503.07    |                    |      | 9.74816   |
| AY-27     | 464                 | 4776   | 9      | 1      |         |           | 11.33              | 35   |           |
|           |                     |        | 9      | 1      |         |           |                    |      |           |
|           |                     |        | 503    | 4001   | 0.9702  | 503.07    |                    |      | 9.74816   |
| AY-28     | 464                 | 4776   | 9      | 1      |         |           | 11.33              | 35   |           |
|           |                     |        | 9      | 1      |         |           |                    |      |           |
|           |                     |        | 503    | 4001   | 0.9702  | 503.07    |                    |      | 9.74816   |
| AY-29     | 464                 | 4776   | 9      | 1      |         |           | 11.33              | 35   |           |
|           |                     |        | 9      | 1      |         |           |                    |      |           |
|           |                     |        | 503    | 4001   | 0.9702  | 503.07    |                    |      | 9.74816   |
| AY-30     | 464                 | 4776   | 9      | 1      |         |           | 11.33              | 35   |           |
|           |                     |        | 9      | 1      |         |           |                    |      |           |
|           |                     |        | 503    | 4001   | 0.9702  | 503.07    |                    |      | 9.74816   |
| AY-31     | 464                 | 4776   | 9      | 1      |         |           | 11.33              | 35   |           |
|           |                     |        | 9      | 1      |         |           |                    |      |           |
|           |                     |        | 503    | 4001   | 0.9702  | 503.07    |                    |      | 9.74816   |
| AY-32     | 464                 | 4776   | 9      | 1      |         |           | 11.33              | 35   |           |
|           |                     |        | 9      | 1      |         |           |                    |      |           |
|           |                     |        | 503    | 4001   | 0.9702  | 503.07    |                    |      | 9.74816   |
| AY-33     | 464                 | 4776   | 9      | 1      |         |           | 11.33              | 35   |           |
|           |                     |        | 9      | 1      |         |           |                    |      |           |
|           |                     |        | 503    | 4001   | 0.9702  | 503.07    |                    |      | 9.74816   |
| AY-34     | 464                 | 4776   | 9      | 1      |         |           | 11.33              | 35   |           |
|           |                     |        | 9      | 1      |         |           |                    |      |           |
|           |                     |        | 503    | 4001   | 0.9702  | 503.07    |                    |      | 9.74816   |
| AY-35     | 464                 | 4776   | 9      | 1      |         |           | 11.33              | 35   |           |
|           |                     |        | 9      | 1      |         |           |                    |      |           |
|           |                     |        | 503    | 4001   | 0.9702  | 503.07    |                    |      | 9.74816   |
| AY-36     | 464                 | 4776   | 9      | 1      |         |           | 11.33              | 35   |           |
|           |                     |        | 9      | 1      |         |           |                    |      |           |
|           |                     |        | 503    | 4001   | 0.9702  | 503.07    |                    |      | 9.74816   |
| AY-37     | 464                 | 4776   | 9      | 1      |         |           | 11.33              | 35   |           |
|           |                     |        | 9      | 1      |         |           |                    |      |           |
|           |                     |        | 503    | 4001   | 0.9702  | 503.07    |                    |      | 9.74816   |
| AY-38     | 464                 | 4776   | 9      | 1      |         |           | 11.33              | 35   |           |
|           |                     |        | 9      | 1      |         |           |                    |      |           |
|           |                     |        | 503    | 4001   | 0.9702  | 503.07    |                    |      | 9.74816   |
| AY-39     | 464                 | 4776   | 9      | 1      |         |           | 11.33              | 35   |           |
|           |                     |        | 9      | 1      |         |           |                    |      |           |
|           |                     |        | 503    | 4001   | 0.9702  | 503.07    |                    |      | 9.74816   |
| AY-40     | 464                 | 4776   | 9      | 1      |         |           | 11.33              | 35   |           |
|           |                     |        | 9      | 1      |         |           |                    |      |           |
|           |                     |        | 503    | 4001   | 0.9702  | 503.07    |                    |      | 9.74816   |

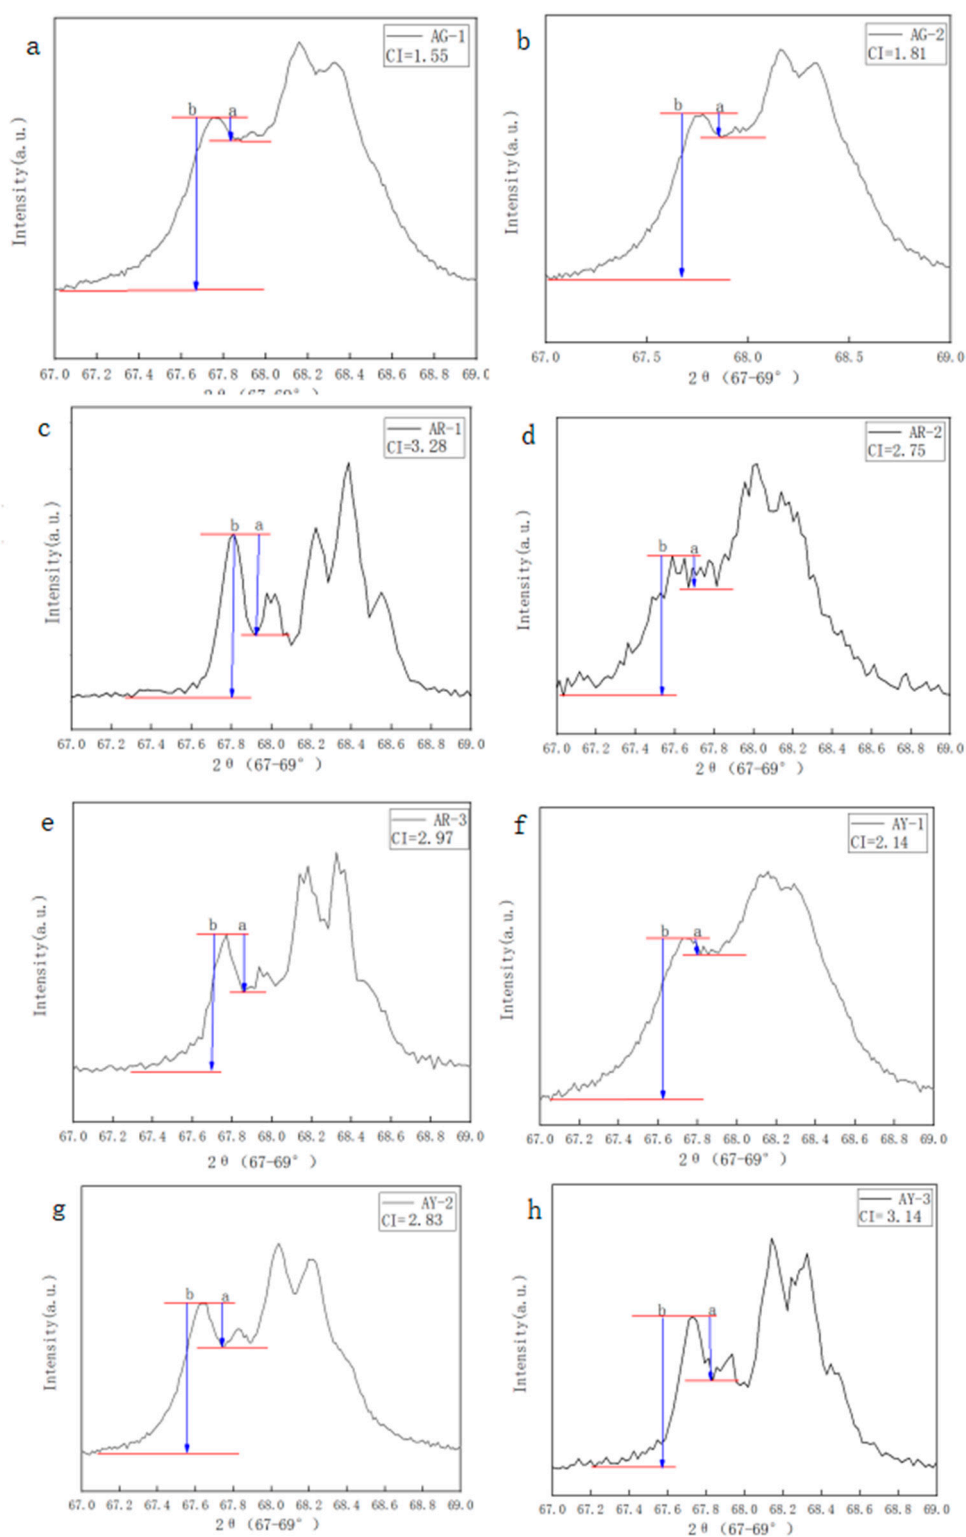

**Figure S1.** The five-finger Peak in the  $67-69^\circ$  of Moqi Agate (a-h respectively stands for AG-1~AG-2, AR-1~AR-3, and AY-1~AY-3) .
